# Supplementary material for: Effect of peer support interventions on cardiovascular disease risk factors in adults with diabetes: a systematic review and meta-analysis
Source: Springer Nature journal article supplement (doi:10.1186/s12889-018-5326-8), 2018-03-22

### Regression of Std diff in means on Baseline SBP

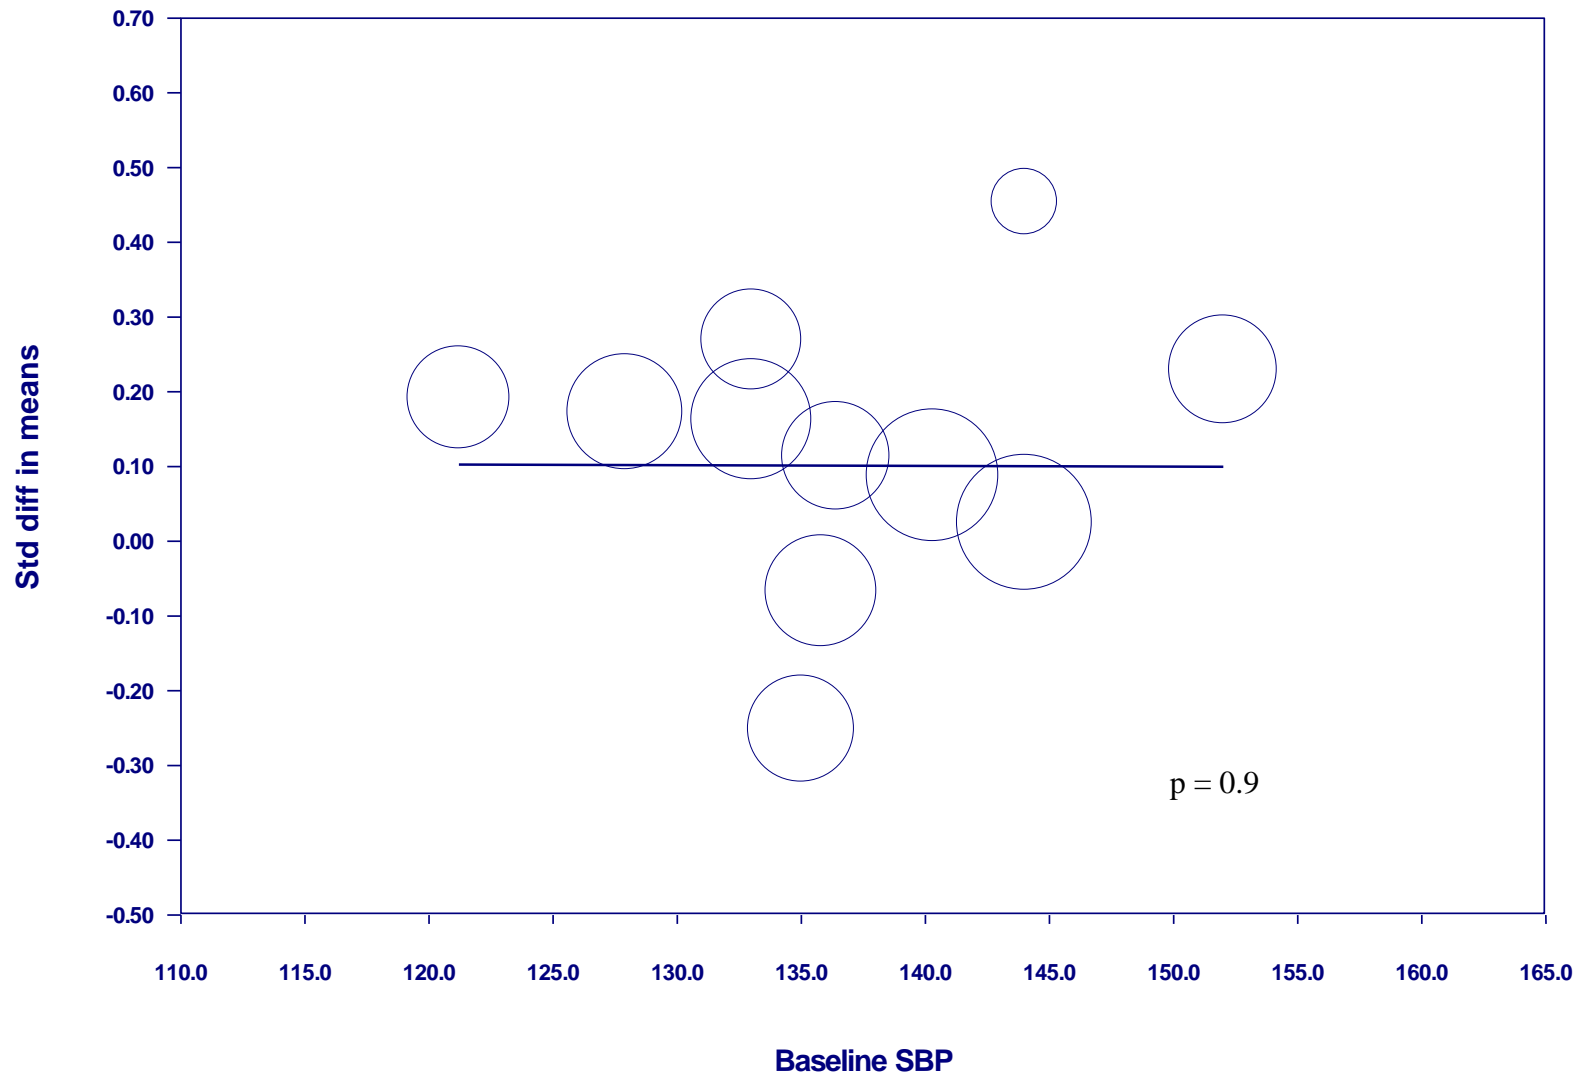

Supplement: MOESM2 [file 15560448]
