# Supplementary material for: Effect of peer support interventions on cardiovascular disease risk factors in adults with diabetes: a systematic review and meta-analysis
Source: Springer Nature journal article supplement (doi:10.1186/s12889-018-5326-8), 2018-03-22

**Funnel Plot of Standard Error by Std diff in means**

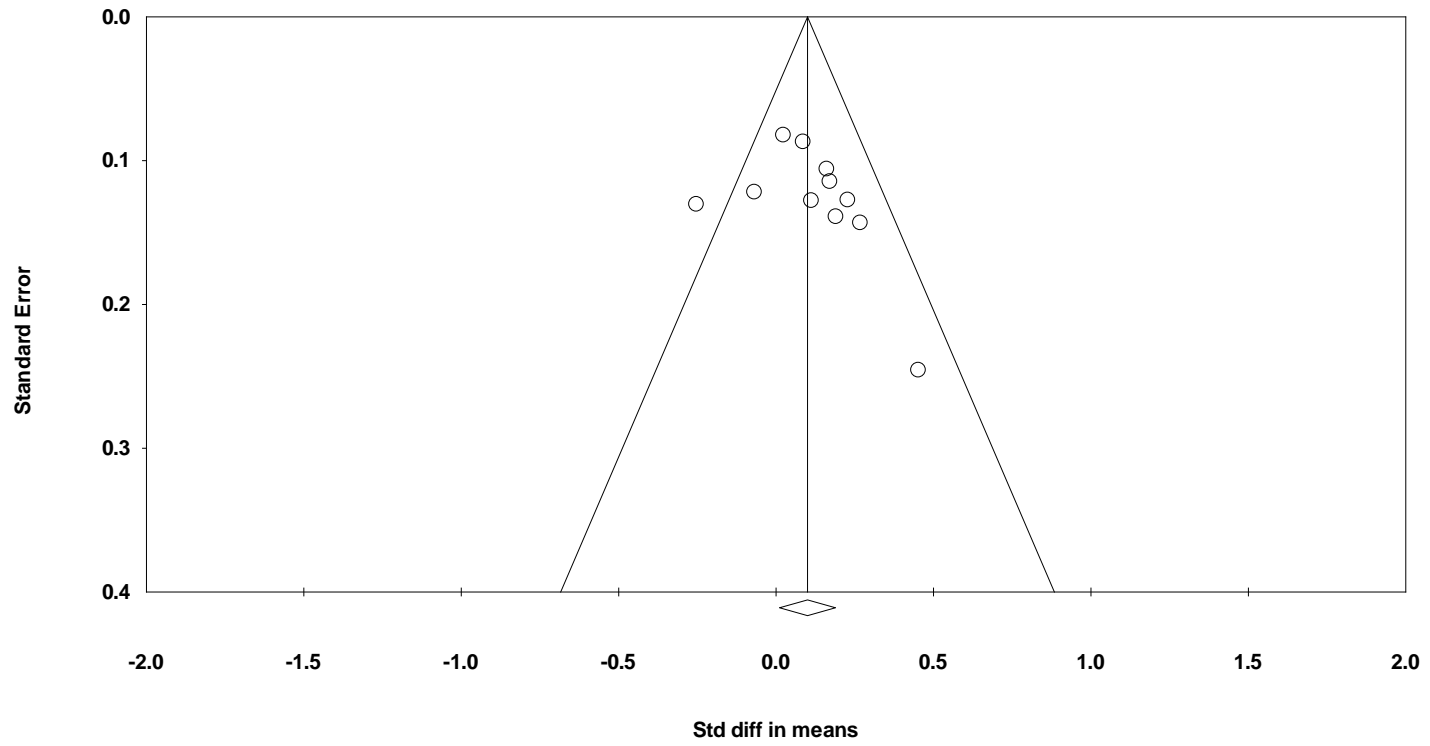

Supplement: MOESM3 [file 15560448]
