# Supplementary material for: Effect of peer support interventions on cardiovascular disease risk factors in adults with diabetes: a systematic review and meta-analysis
Source: Springer Nature journal article supplement (doi:10.1186/s12889-018-5326-8), 2018-03-22

---

**Study name****Statistics for each study****Std diff in means and 95% CI**

|                             | <b>Std diff<br/>in means</b> | <b>Lower<br/>limit</b> | <b>Upper<br/>limit</b> | <b>p-Value</b> |
|-----------------------------|------------------------------|------------------------|------------------------|----------------|
| Cade et al, 2009            | 0.075                        | -0.186                 | 0.337                  | 0.571          |
| Heisler et al, 2010         | 0.053                        | -0.198                 | 0.305                  | 0.676          |
| Philis-Tsimakas et al, 2011 | 0.340                        | -0.008                 | 0.688                  | 0.055          |
| Gagliardino et al, 2013     | -0.410                       | -0.696                 | -0.125                 | 0.005          |
| Siminerio et al, 2013       | 0.380                        | -0.100                 | 0.861                  | 0.121          |
| Chan et al, 2014            | -0.025                       | -0.187                 | 0.137                  | 0.764          |
| Simmons et al, 2015         | 0.109                        | -0.062                 | 0.280                  | 0.213          |
| Ayala et al, 2015           | 0.011                        | -0.231                 | 0.253                  | 0.930          |
| Sazlina et al, 2015         | 0.084                        | -0.494                 | 0.662                  | 0.776          |
|                             | 0.039                        | -0.086                 | 0.164                  | 0.540          |

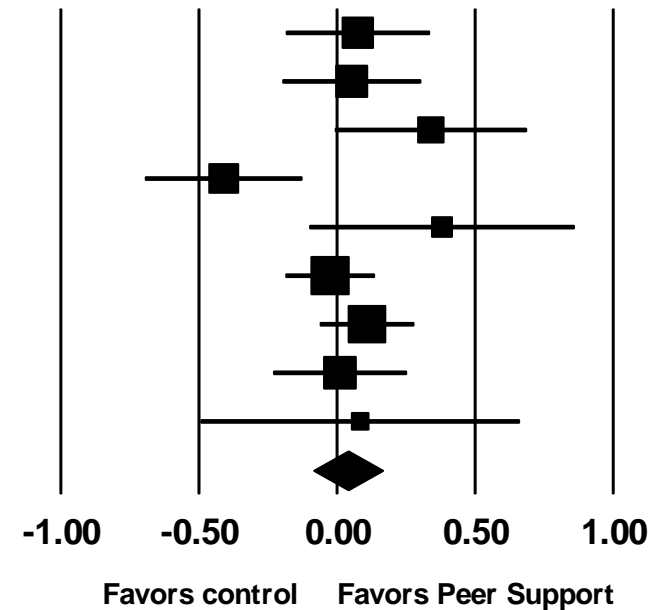

Supplement: MOESM5 [file 15560448]
