# Supplementary material for: Effect of peer support interventions on cardiovascular disease risk factors in adults with diabetes: a systematic review and meta-analysis
Source: Springer Nature journal article supplement (doi:10.1186/s12889-018-5326-8), 2018-03-22
Supplement: MOESM6 [file 15560448]

---

**Study name****Statistics for each study****Std diff in means and 95% CI**

|                             | <b>Std diff<br/>in means</b> | <b>Lower<br/>limit</b> | <b>Upper<br/>limit</b> | <b>p-Value</b> |
|-----------------------------|------------------------------|------------------------|------------------------|----------------|
| Keyserling et al, 2002      | 0.150                        | -0.190                 | 0.490                  | 0.388          |
| Cade et al, 2009            | 0.178                        | -0.094                 | 0.449                  | 0.199          |
| Philis-Tsimakas et al, 2011 | 0.167                        | -0.106                 | 0.440                  | 0.232          |
| Smith et al, 2011           | 0.001                        | -0.199                 | 0.200                  | 0.996          |
| Gagliardino et al, 2013     | 0.201                        | -0.107                 | 0.508                  | 0.201          |
| Siminerio et al, 2013       | -0.093                       | -0.569                 | 0.384                  | 0.703          |
| Chan et al, 2014            | -0.029                       | -0.191                 | 0.133                  | 0.729          |
| Simmons et al, 2015         | 0.059                        | -0.096                 | 0.213                  | 0.457          |
| <b>Summary effect</b>       | <b>0.058</b>                 | <b>-0.022</b>          | <b>0.138</b>           | <b>0.156</b>   |

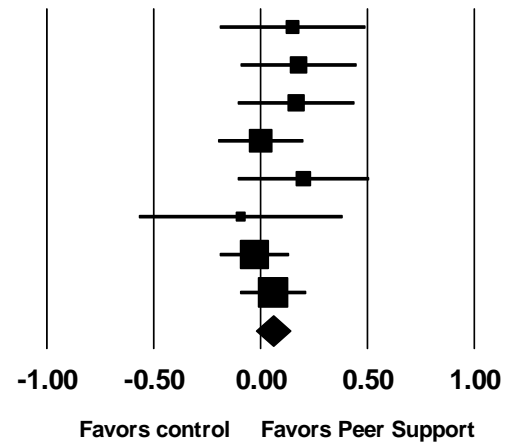

Favors control    Favors Peer Support

---
