# Supplementary material for: Effect of peer support interventions on cardiovascular disease risk factors in adults with diabetes: a systematic review and meta-analysis
Source: Springer Nature journal article supplement (doi:10.1186/s12889-018-5326-8), 2018-03-22

---

**Study name****Statistics for each study****Std diff in means and 95% CI**

|                             | Std diff<br>in means | Lower<br>limit | Upper<br>limit | p-Value      |
|-----------------------------|----------------------|----------------|----------------|--------------|
| Philis-Tsimakas et al, 2011 | 0.113                | -0.236         | 0.463          | 0.525        |
| Siminerio et al, 2013       | -0.147               | -0.624         | 0.330          | 0.545        |
| Thom et al, 2013            | 0.027                | -0.228         | 0.282          | 0.836        |
| Chan et al, 2014            | -0.036               | -0.197         | 0.126          | 0.667        |
| Safford et al, 2015         | -0.114               | -0.354         | 0.126          | 0.351        |
| Sazlina et al, 2015         | 0.574                | -0.016         | 1.164          | 0.056        |
| <b>Summary effect</b>       | <b>-0.008</b>        | <b>-0.124</b>  | <b>0.109</b>   | <b>0.895</b> |

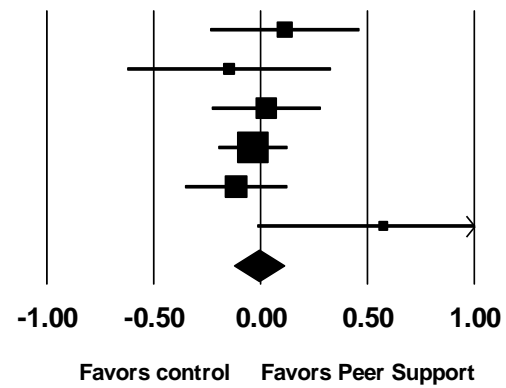

Supplement: MOESM7 [file 15560448]
