# Supplementary material for: Effect of peer support interventions on cardiovascular disease risk factors in adults with diabetes: a systematic review and meta-analysis
Source: Springer Nature journal article supplement (doi:10.1186/s12889-018-5326-8), 2018-03-22

---

**Study name****Statistics for each study****Std diff in means and 95% CI**

|                             | <b>Std diff<br/>in means</b> | <b>Lower<br/>limit</b> | <b>Upper<br/>limit</b> | <b>p-Value</b> |
|-----------------------------|------------------------------|------------------------|------------------------|----------------|
| Cade et al, 2009            | -0.018                       | -0.301                 | 0.265                  | 0.902          |
| Philis-Tsimakas et al, 2011 | -0.071                       | -0.344                 | 0.201                  | 0.608          |
| Gagliardino et al, 2013     | 0.000                        | -0.286                 | 0.286                  | 1.000          |
| Siminerio et al, 2013       | -0.029                       | -0.505                 | 0.447                  | 0.905          |
| Thom et al, 2013            | 0.000                        | -0.255                 | 0.255                  | 1.000          |
| Chan et al, 2014            | 0.068                        | -0.094                 | 0.230                  | 0.410          |
| Safford et al, 2015         | -0.100                       | -0.340                 | 0.140                  | 0.414          |
| McGowan et al, 2015         | 0.127                        | -0.136                 | 0.390                  | 0.343          |
| Sazlina et al, 2015         | 0.276                        | -0.304                 | 0.857                  | 0.351          |
| <b>Summary effect</b>       | <b>0.017</b>                 | <b>-0.071</b>          | <b>0.104</b>           | <b>0.706</b>   |

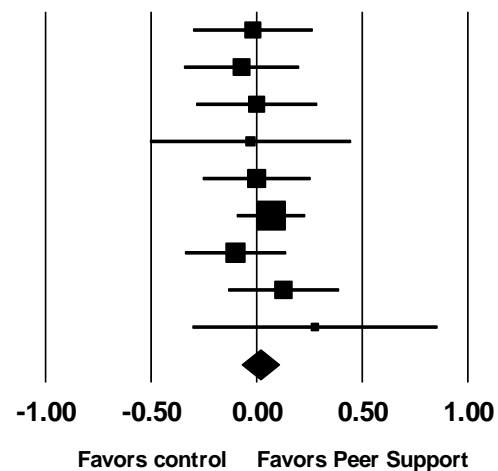

Supplement: MOESM8 [file 15560448]
