# Supplementary material for: Effect of peer support interventions on cardiovascular disease risk factors in adults with diabetes: a systematic review and meta-analysis
Source: Springer Nature journal article supplement (doi:10.1186/s12889-018-5326-8), 2018-03-22

---

**Study name****Statistics for each study****Std diff in means and 95% CI**

|                        | <b>Std diff<br/>in means</b> | <b>Lower<br/>limit</b> | <b>Upper<br/>limit</b> | <b>p-Value</b> |
|------------------------|------------------------------|------------------------|------------------------|----------------|
| Keyserling et al, 2002 | 0.136                        | -0.240                 | 0.512                  | 0.479          |
| Lorig et al, 2008      | 0.015                        | -0.194                 | 0.224                  | 0.891          |
| Lorig et al, 2009      | 0.094                        | -0.172                 | 0.360                  | 0.489          |
| Smith et al, 2011      | -0.029                       | -0.251                 | 0.194                  | 0.800          |
| Siminerio et al, 2013  | -0.059                       | -0.535                 | 0.418                  | 0.809          |
| Chan et al, 2014       | -0.026                       | -0.183                 | 0.130                  | 0.740          |
| Ayala, 2015            | 0.000                        | -0.225                 | 0.225                  | 1.000          |
| Sazlina et al, 2015    | 0.645                        | 0.052                  | 1.238                  | 0.033          |
| <b>Summary effect</b>  | <b>0.019</b>                 | <b>-0.068</b>          | <b>0.106</b>           | <b>0.666</b>   |

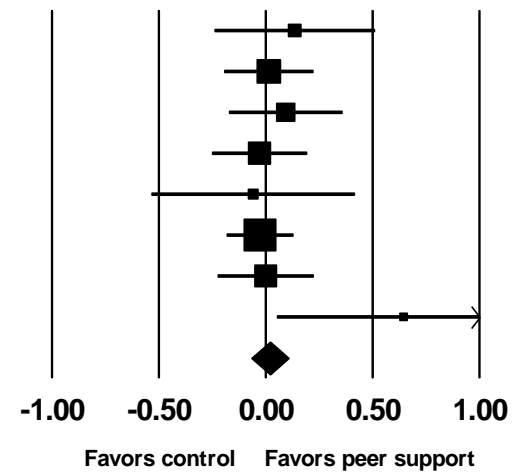

Supplement: MOESM9 [file 15560448]
